# Supplementary material for: A flexible algorithm for network design based on information theory
Source: Copernicus journal article supplement (doi:10.5194/amt-16-235-2023), 2023-01-19

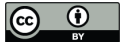

*Supplement of*

## **A flexible algorithm for network design based on information theory**

**Rona L. Thompson and Ignacio Pizzo**

*Correspondence to:* Rona L. Thompson (rlt@nilu.no)

The copyright of individual parts of the supplement might differ from the article licence.

Figure S1.  $\Delta^{14}\text{CO}_2$  variations at each site in the ICOS network simulated hourly from 12:00 to 15:00 every day for one year (the x-axis is day of the year).

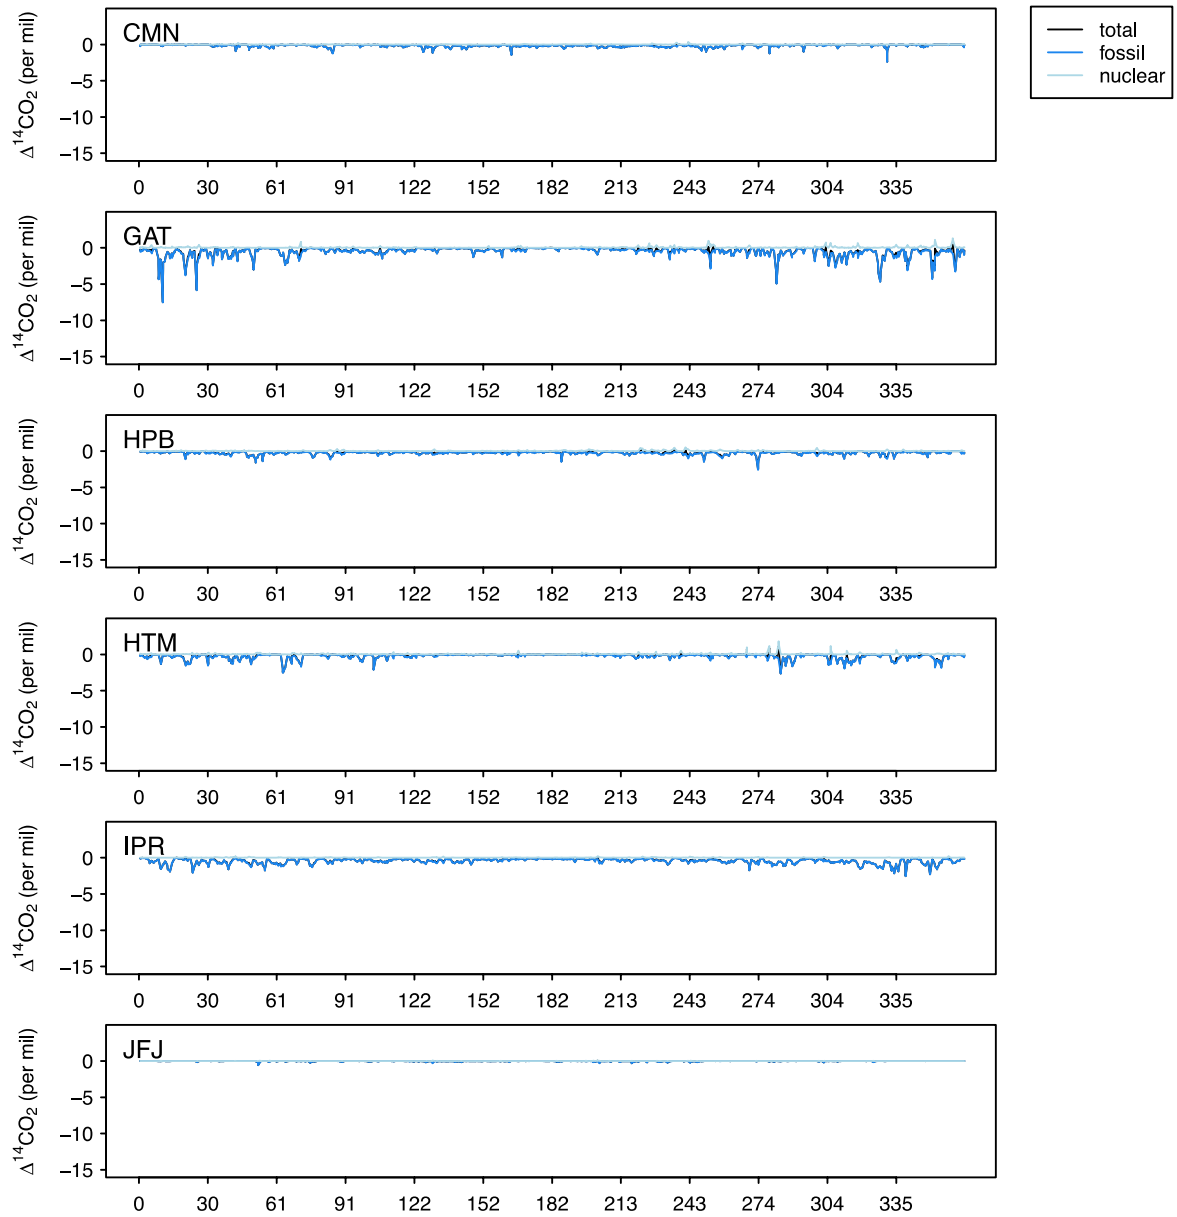

Figure S1: continued.

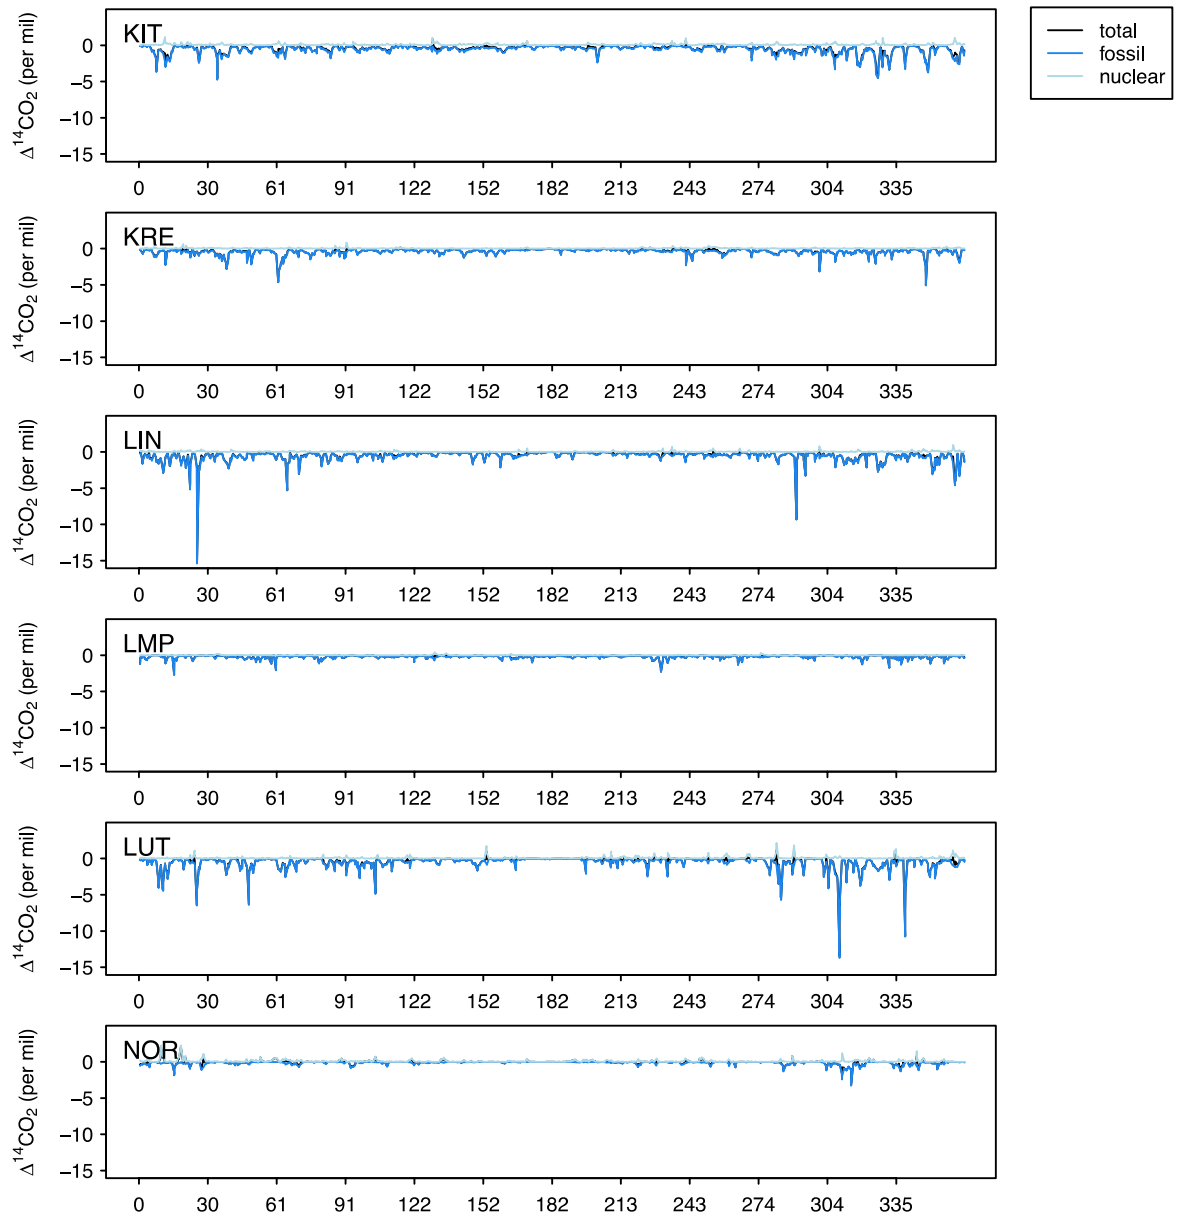

Figure S1: continued

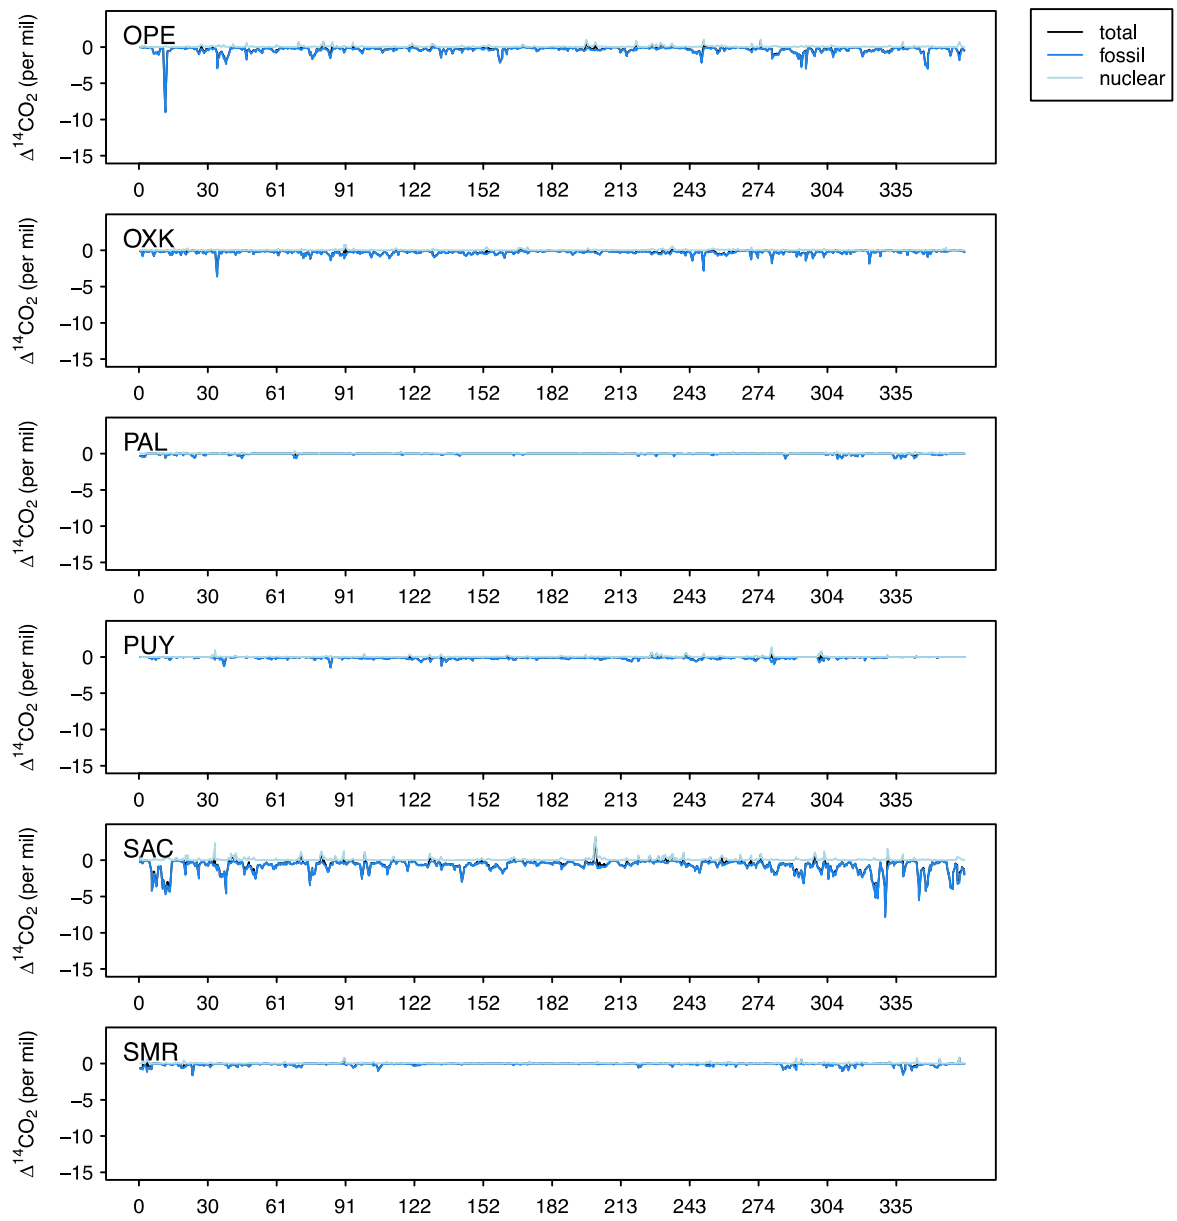

Figure S1: continued

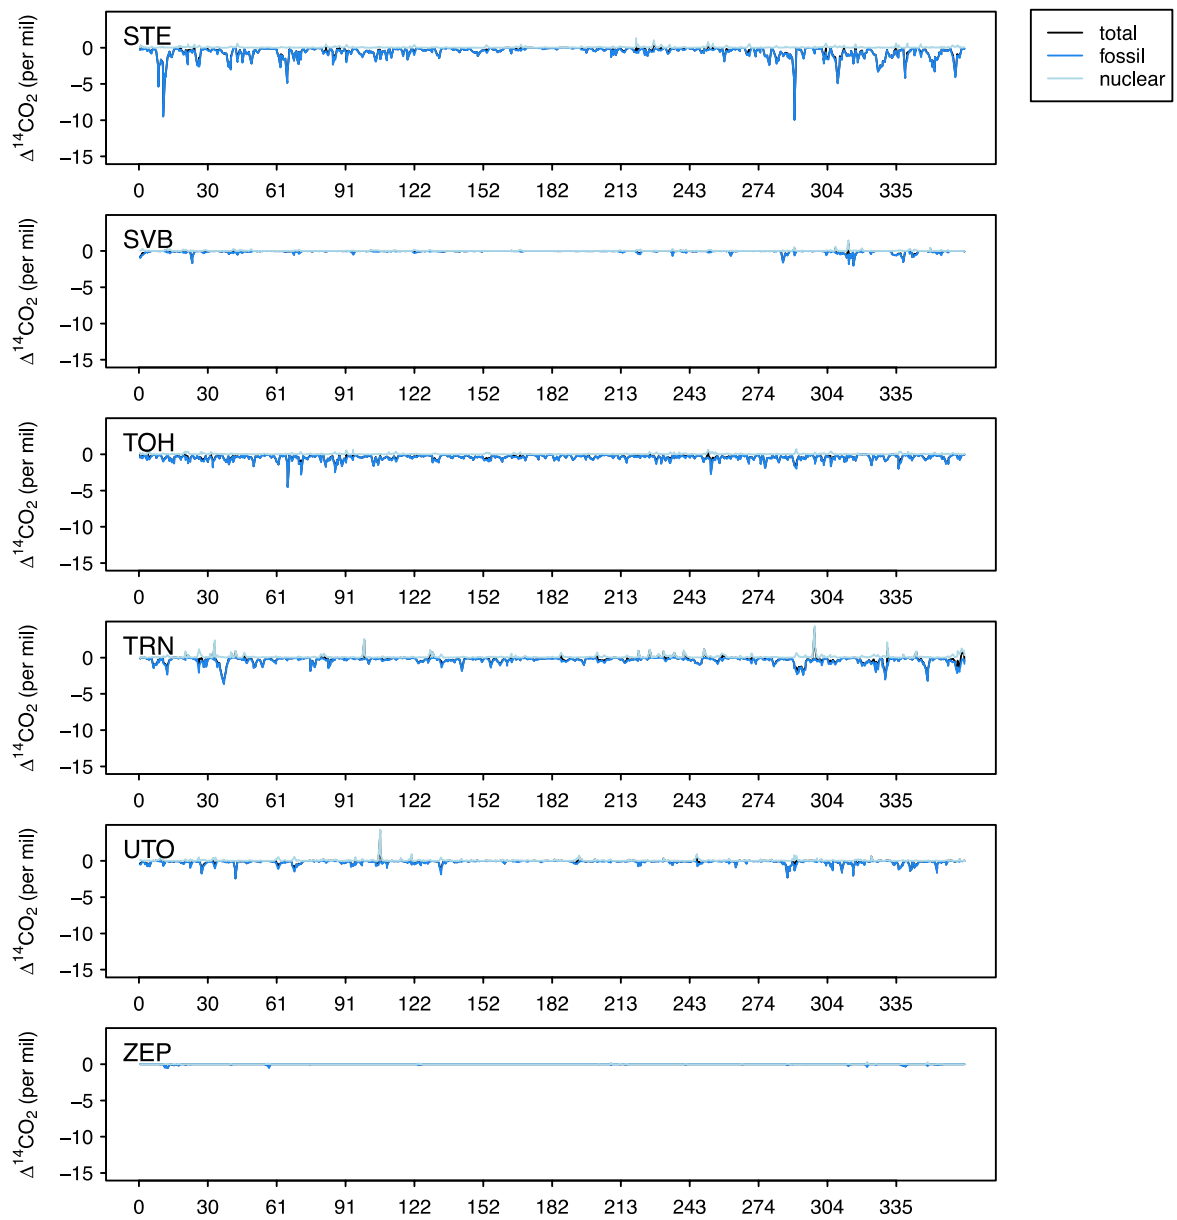

Supplement: Supplementary file 1 [file amt-16-235-2023-supplement.pdf]
